# Supplementary material
Source: Springer Nature journal article supplement (https://www.springermedizin.de/resource/supplementary/13063_2012_1321_MOESM1_ESM.pdf/9619406)
Supplement: MOESM1 [file 9619406]

**General Practitioner Referral**  
to Rapid Access Chest Pain Clinic

**Rapid Access Chest Pain Clinic**  
History, examination and ECG ± ECG exercise test

**Diagnosis**  
Symptoms: Angina/Atypical angina/Non-cardiac chest pain  
Presence of CHD: Yes/Probable/Unlikely/No  
**Angina due to CHD: Yes/Probable/Unlikely/No**

**Further Investigations**  
Non-invasive imaging (CT prohibited)  
Invasive angiography  
Non-cardiac investigations

**Treatment**  
Secondary Prevention  
Anti-anginal Therapy (drugs, revascularisation)  
Non-cardiac therapies

**Follow-up**  
Discharge  
Out-patient review  
Out-patient review following further investigation

**Consider for SCOT-HEART Trial**

**Recruited to SCOT-HEART**  
Consent  
Take blood for Cholesterol  
(HDL and Total)  
Enter into web-site for  
randomisation

**Non-recruited Eligible**  
Retain anonymised  
proforma  
Enter into database

**Ineligible**  
Retain anonymised  
proforma  
Enter into database
